# LIM homeobox transcription factors integrate signaling events that control three-dimensional limb patterning and growth

Itai Tzchori<sup>1,\*</sup>, Timothy F. Day<sup>2,\*</sup>, Peter J. Carolan<sup>2,†</sup>, Yangu Zhao<sup>1</sup>, Christopher A. Wassif<sup>3</sup>, LiQi Li<sup>4</sup>, Mark Lewandoski<sup>5</sup>, Marat Gorivodsky<sup>2</sup>, Paul E. Love<sup>4</sup>, Forbes D. Porter<sup>3</sup>, Heiner Westphal<sup>1,‡</sup> and Yingzi Yang<sup>2,‡</sup>

Vertebrate limb development is controlled by three signaling centers that regulate limb patterning and growth along the proximodistal (PD), anteroposterior (AP) and dorsoventral (DV) limb axes. Coordination of limb development along these three axes is achieved by interactions and feedback loops involving the secreted signaling molecules that mediate the activities of these signaling centers. However, it is unknown how these signaling interactions are processed in the responding cells. We have found that distinct LIM homeodomain transcription factors, encoded by the LIM homeobox (LIM-HD) genes *Lhx2*, *Lhx9* and *Lmx1b* integrate the signaling events that link limb patterning and outgrowth along all three axes. Simultaneous loss of *Lhx2* and *Lhx9* function resulted in patterning and growth defects along the AP and the PD limb axes. Similar, but more severe, phenotypes were observed when the activities of all three factors, *Lmx1b*, *Lhx2* and *Lhx9*, were significantly reduced by removing their obligatory co-factor *Ldb1*. This reveals that the dorsal limb-specific factor *Lmx1b* can partially compensate for the function of *Lhx2* and *Lhx9* in regulating AP and PD limb patterning and outgrowth. We further showed that *Lhx2* and *Lhx9* can fully substitute for each other, and that *Lmx1b* is partially redundant, in controlling the production of output signals in mesenchymal cells in response to *Fgf8* and *Shh* signaling. Our results indicate that several distinct LIM-HD transcription factors in conjunction with their *Ldb1* co-factor serve as common central integrators of distinct signaling interactions and feedback loops to coordinate limb patterning and outgrowth along the PD, AP and DV axes after limb bud formation.

**KEY WORDS:** *Ldb1*, *Lhx9*, *Lhx2*, Limb development, *Lmx1b*, Signaling, Mouse

## INTRODUCTION

Vertebrate limb outgrowth and patterning are coordinately regulated by signaling centers that produce secreted factors to control the behavior of their neighboring cells. During this process, transcription factors regulate both signal reception and emission by controlling gene expression. Proximodistal (PD) limb bud outgrowth is regulated by a positive-feedback loop between fibroblast growth factor 10 (*Fgf10*) of the distal limb mesenchyme and Fgfs of the apical ectodermal ridge (AER) (Lewandoski et al., 2000; Min et al., 1998; Ohuchi et al., 1997; Sekine et al., 1999; Sun et al., 2002). *Fgf10* is required for PD limb outgrowth as the limb bud in the *Fgf10*<sup>-/-</sup> mouse embryo fails to grow (Min et al., 1998; Sekine et al., 1999). The AER, a thickened epithelial structure formed at the distal edge of the limb bud, serves as a signaling center to control PD limb outgrowth and patterning (Bell et al., 1959) by secreting multiple Fgfs (Martin, 1998). Among these, *Fgf4* and *Fgf8* play prominent roles as limb bud development fails in their absence

(Sun et al., 2002). In addition to sustaining cell survival, AER-Fgfs regulate PD-patterning gene expression during early limb bud development to specify a distal domain (Mariani et al., 2008). T-box transcription factors *Tbx5* and *Tbx4* are required for forelimb and hindlimb initiation, respectively, by activating the expression of *Fgf10* in the presumptive and early limb bud mesenchyme (Agarwal et al., 2003; Naiche and Papaioannou, 2003; Rallis et al., 2003). They are not required for subsequent limb outgrowth or *Fgf10* expression once the limb bud has formed (Hasson et al., 2007; Naiche and Papaioannou, 2007). Thus, the transcription mechanism that regulates *Fgf10* expression in response to *Fgf8* after limb bud initiation remains to be elucidated.

Anteroposterior (AP) limb patterning is controlled by Sonic hedgehog (*Shh*) expressed in the zone of polarizing activity (ZPA) located at the posterior limb margin (Riddle et al., 1993). AP limb patterning and growth is intrinsically connected to PD limb outgrowth. *Shh* signaling is required for *Fgf4* expression in the AER (Laufer et al., 1994; Niswander et al., 1994). It also maintains the AER structure itself by regulating gremlin 1 (*Grem1*) expression (Khokha et al., 2003; Zuniga et al., 1999). Conversely, Fgf signaling from the AER controls *Shh* expression in the ZPA (Laufer et al., 1994; Niswander et al., 1994). However, little is known about the transcriptional control of *Shh*-Fgf signaling interactions.

Dorsoventral (DV) limb patterning is controlled by *Wnt7a* in the dorsal ectoderm and by engrailed 1 (*En1*) in the ventral ectoderm (Loomis et al., 1996; Parr and McMahon, 1995). *Wnt7a* activates the expression of a LIM homeodomain (LIM-HD) transcription factor *Lmx1b* in the dorsal limb mesenchyme (Riddle et al., 1995), and *Lmx1b* determines dorsal cell fates (Chen et al., 1998; Dreyer et al., 1998; Vogel et al., 1995). DV limb polarity also indirectly affects AP limb patterning because *Wnt7a* is required to regulate *Shh* expression in the ZPA (Parr and

<sup>1</sup>Section on Mammalian Molecular Genetics, Laboratory of Mammalian Genes and Development, Eunice Kennedy Shriver National Institute of Child Health and Human Development, Bethesda, MD 20892, USA. <sup>2</sup>Section on Developmental Genetics, Genetic Disease Research Branch, National Human Genome Research Institute, Bethesda, MD 20892, USA. <sup>3</sup>Section on Molecular Dysmorphology, Heritable Disorders Branch, Eunice Kennedy Shriver National Institute of Child Health and Human Development, Bethesda, MD 20892, USA. <sup>4</sup>Section on Cellular and Developmental Biology, Laboratory of Mammalian Genes and Development, Eunice Kennedy Shriver National Institute of Child Health and Human Development, Bethesda, MD 20892, USA. <sup>5</sup>Laboratory of Cancer and Developmental Biology, NCI-Frederick, National Institutes of Health, Frederick, MD 21702, USA.

\*These authors contributed equally to the work

<sup>†</sup>Present address: Department of Stem Cell and Regenerative Biology, Harvard Stem Cell Institute, Harvard University, 7 Divinity Avenue, Cambridge, MA 02138, USA

<sup>‡</sup>Authors for correspondence (e-mails: hw@mail.nih.gov; yingzi@mail.nih.gov)

McMahon, 1995; Yang and Niswander, 1995). Again, the transcription factors that regulate *Shh* expression and limb DV and AP limb patterning are still unknown.

The LIM-HD regulators of transcription are evolutionarily conserved. In the developing *Drosophila* wing, the LIM-HD transcription factor apterous (*ap*) is expressed in dorsal cells and is required to specify dorsal cell fates. *ap* also directs limb outgrowth by establishing a signaling center at the boundary between dorsal and ventral cells (Cohen et al., 1992; Diaz-Benjumea and Cohen, 1993; Ng et al., 1996). In the developing mouse limb, *Lhx2* and *Lhx9*, two functional homologs of *ap*, are expressed in the distal limb bud, whereas *Lmx1b*, another homolog of *ap*, is expressed in the dorsal limb mesenchyme (Chen et al., 1998; Rincon-Limas et al., 1999; Rodriguez-Esteban et al., 1998). However, neither *Lhx2* nor *Lhx9* mouse mutants show limb defects (Birk et al., 2000; Porter et al., 1997).

Here, we have taken a multifaceted loss-of-function approach to test whether three of the LIM-HD genes, *Lmx1b*, *Lhx2* and *Lhx9*, act together to control mouse limb development in a way that resembles that of *ap* in *Drosophila* wing development. We have determined that *Lhx2*, *Lhx9* and *Lmx1b* are major LIM-HD family members expressed in the developing limb bud. The limbs of the *Lhx2*<sup>-/-</sup>; *Lhx9*<sup>-/-</sup> double mutant embryos were significantly shorter with fewer digits. In addition, the function of *Lhx2*, *Lhx9* and *Lmx1b* was reduced simultaneously in the pre-limb mesenchyme by Cre-mediated inactivation of *Ldb1*, which encodes an essential cofactor of LIM-HD factors (Agulnick et al., 1996; Mukhopadhyay et al., 2003; Zhao et al., 2007). In the *Ldb1* mutant embryos, the limbs were ventralized and more severely shortened. Our analysis demonstrates that *Ldb1* is required to maintain the expression of *Fgf10* and *Grem1* in the limb mesenchyme in response to *Fgf8* and *Shh*, respectively. We conclude that a transcriptional apparatus encompassing LIM-HD factors and their co-factor *Ldb1* acts as a central signaling integrator in distal limb mesenchymal cells to link limb patterning and growth along all three axes.

## MATERIALS AND METHODS

### Generation and genotyping the mouse lines

The *Lhx2*<sup>+/-</sup>, *Lhx9*<sup>+/-</sup> and *Ldb1*<sup>cre</sup> mice have been described previously (Birk et al., 2000; Porter et al., 1997; Zhao et al., 2007). Genotyping was performed by PCR using genomic DNA prepared from tail snips or extra-embryonic membranes. The oligonucleotides used to genotype *T-Cre* mice were: Cre forward, 5'-CCATGAGTGAACGAACCTGG-3'; Cre reverse, 5'-GGGACCCATTTTCTCTCC-3'. Conditional *Ldb1* mice were genotype by using these oligos: *Ldb1* forward, 5'-CAGCAAACGGAG-GAAACGGAAGATGTCAG-3'; and *Ldb1* reverse, 5'-CTTATGTGAC-CACACCCATGCATGCATGTG-3'. To genotype the *Ldb1* null allele, two oligos were used: NEO 3R forward, 5'-ACGAGTTCTTCT-GAGGGGATC-3'; *Ldb1* reverse, 5'-TGCCACACAGAATCTGCTCT-GAACGTCT-3'.

### Skeletal analysis

Embryos at 15.5 dpc or 18.5 dpc were dissected in PBS. The embryos were skinned, eviscerated and fixed in 95% ethanol. Skeletal preparations were performed as described previously (McLeod, 1980).

### Histology, in situ hybridization and immunohistochemistry

For in situ hybridization, embryos were fixed in 4% paraformaldehyde at 4°C overnight. Some fixed samples were embedded in paraffin and sectioned at 5 µm. Histological analysis, immunohistochemistry, whole-mount and radioactive <sup>35</sup>S RNA in situ hybridization were performed as described previously (Yang et al., 2003). The following primary antibodies were used: anti-*Ldb1* polyclonal anti-*Ldb1* (prepared in the lab 1:4000); anti-phospho-histone H3 antibody (1:500, Millipore); anti-BrdU (1:20, Chemicon); and anti-cleaved caspase 3 (Asp 175) (1:400, Cell Signaling

Technology). Signals were detected using the Vectastain ABC kit (Vector Laboratories, Burlingame, CA, USA). The slides were counterstained with Methyl Green or Toluidine Blue.

### Limb explant culture

Limbs were removed from 10.5 dpc and 11.25 dpc embryos and cultured on nuclearpore filters (0.1 µm pore size, Whatman) at the interphase of air and medium (BGJB, Invitrogen) with antibiotics/antimycotic solution (Invitrogen). Beads were soaked in 1 µg/µl of either BSA, *Shh*, *Fgf10* or *Fgf8* protein (R&D Systems) for 1 hour and then inserted into the limbs. Limbs were cultured for 20-24 hours, fixed with 4% paraformaldehyde in PBS and then processed for whole-mount in situ hybridization.

### Cell proliferation and apoptosis assays

Paraffin wax-embedded sections were stained with the rabbit anti-phospho-histone H3 antibody. Signals were detected using biotin-conjugated secondary antibodies using ABC kit (Vectastain). Cell death was detected as described previously (Barrow et al., 2003; Reis and Edgar, 2004).

### Primers used for examining the expression of LIM-HD genes by RT-PCR

Primers used were: *Lhx1* F, 5'AGACTGGCCTCAACATGCGTGTTA; *Lhx1* R, 5'GTGCCAGGATGTCAGTAAATCGCT; *Lhx2* F, 5'AGCA-CACTTTAACCATGCCGACGT; *Lhx2* R, 5'ATTGTCCGAAGCTG-GTGTTGCTT; *Lhx3* F, 5'ACCGACATTGGCACAGCAAGTGT; *Lhx3* R, 5'TCGCTGCTTGGCTGTTTCGTAGT; *Lhx4* F, 5'ACTTTGTCTAC-CACCTGCACCTGCT; *Lhx4* R, 5'GGCTCCTTTGACACTCTTGTA-GA; *Lhx5* F, 5'CTCATCGGACAAGGAAACCGCTAACA; *Lhx5* R, 5'GGAGCGTAGTAGTCACTTTGGTAGT; *Lhx6* F, 5'CTCTGGA-CAAGGACGAAGGTAGA; *Lhx6* R, 5'CTCTTTGAGGTTCTCGAT-CATGGT; *Lhx8* F, 5'ATGACTTATGCTGGCATGTCCGCT; *Lhx8* R, 5'AGTGCACCTACAGAGGACCTTCT; *Lhx9* F, 5'ATCTGCTGGC-CGTAGACAAACAGT; *Lhx9* R, 5'TGCCAGTGCCATTGAAGTAAAG-GCA; *Islet1* F, 5'GCTCATGAAGGAGCAACTAGTGGAGA; *Islet1* R, 5'TTAGAGCCTGGTCTCTCTTCTGAA; *Islet2* F, 5'ACGCGCTCAT-GAAAGAGCAGCTAGTA; *Islet2* R, 5'GAGTGCAAACCTCGTGAAGT-GCTTT; *Lmx1a* F, 5'AAATGGTAGTGGGAATGCGGGCAT; *Lmx1a* R, 5'TTCTGAGGTTGCCAGGAAGCAGT; *Lmx1b* F, 5'AGTGTGTGTAC-CACTTGGGCTGTT; *Lmx1b* R, 5'AGGATGCCTGAAAGCT-CTTCGCT; *Ldb1* F, 5'GAGGCACACACCATATGGTAACCA; *Ldb1* R, 5'ATGAGCTCTGTGTTGCCGGAT; *Ldb2* F, 5'ACTGGAGCCAAT-GCAGGAAGTGTAGT; *Ldb2* R, 5'AAGTCTTCTTCGTCGTCCTATGC-CGTT.

### Preparation of tissues for scanning electron microscopy (SEM)

Samples were prepared for SEM according to the manufacturer (Ted Pella, Reading, CA). Briefly, limb samples were rinsed in 0.2 M sodium cacodylate buffer, postfixed in sodium cacodylate buffer (4% formaldehyde, 2% glutaraldehyde and 0.1 M sodium cacodylate) and stored at 4°C. The samples were dehydrated in graded ethanol solutions (e.g., 35, 50, 70, 95 and 100%), infiltrated in a 1:1 mixture of absolute ethanol and Peldri (Zimmer, 1989), followed by pure Peldri for 1 hour at 37°C. Following a change of pure Peldri, the solution was allowed to solidify at room temperature, and sublimation was completed in a vacuum chamber overnight. The embryos were attached on an SEM aluminum stub with double-sided adhesive tape and coated with gold palladium in a vacuum evaporator. Embryos were photographed with a Hitachi S-570 scanning electron microscope operated at 8 kV.

## RESULTS

### *Lhx2*, *Lhx9* and their co-factor *Ldb1* are required for limb development

*Lhx2*, *Lhx9* and *Lmx1b* are homologous to the *Drosophila ap* gene, a major regulator of wing development. To test whether *Lhx2*, *Lhx9* and *Lmx1b* play redundant roles in regulating limb development, we first compared their expression patterns in the early mouse limb bud (Fig. 1A). At 9.5 days post coitum (dpc), when the forelimb just forms, both *Lhx2* and *Lhx9* were expressed throughout the limb mesenchyme,

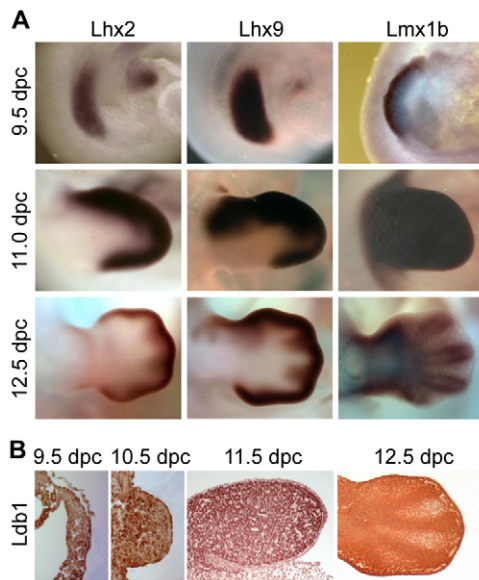

**Fig. 1. Expression of *Lhx2*, *Lhx9*, *Lmx1b* and *Ldb1* in wild-type limb buds.** (A) Whole-mount in situ hybridization of *Lhx2*, *Lhx9* and *Lmx1b*. Only forelimbs are shown. Hindlimbs had the same expression patterns. (B) Expression of the *Ldb1* protein in the hindlimb, as shown by immunohistochemistry on cryosections (9.5 dpc and 10.5 dpc) and paraffin sections (11.5 dpc and 12.5 dpc). *Ldb1* was ubiquitously expressed in the limb bud. See Fig. S1 in the supplementary material for controls of the *Ldb1* antibodies.

whereas *Lmx1b* expression was restricted to the dorsal limb mesenchyme. At later stages (i.e. at 11.0 dpc), when there is substantial PD outgrowth of the limb bud, *Lhx2* and *Lhx9* were similarly expressed in the distal limb mesenchyme. *Lmx1b* expression, although still restricted to the dorsal mesenchyme, showed no PD bias. At 12.5 dpc, when chondrogenesis starts in the limb, *Lhx2* and *Lhx9* expression was still distally restricted and found in the interdigital area. *Lmx1b* expression was weaker in the interdigital area, possibly owing to reduced cell numbers. These results suggest that *Lhx2* and *Lhx9* may play redundant roles in controlling limb development, and that *Lmx1b* may compensate for the function of *Lhx2* and *Lhx9* when they are missing in the dorsal limb bud mesenchyme. We also examined the expression of all LIM-HD genes in the hindlimb bud by reverse transcriptase-polymerase chain reaction (RT-PCR) (see Table S1 in the supplementary material) and found that *Islet1* and *Islet2* were expressed in the limb bud. *Islet1* expression appeared to be confined to the early stages of hindlimb bud development (see Table S1 in the supplementary material), in agreement with the published expression patterns of *Islet1* and *Islet2* in the early limb bud (MGI:3508865, MGI:3509558). Expression of *Islet1* was no longer detected in the hindlimb after 10.5 dpc by whole-mount in situ hybridization. *Ldb1* is an obligatory co-factor of LIM-HD factors, as null mutants of *Ldb1* phenocopy individual or combined mutants of LIM-HD genes in other contexts (Suleiman et al., 2007; Zhao et al., 2007). *Ldb1* protein was ubiquitously expressed in the limb bud at all stages that we analyzed (Fig. 1B).

We generated *Lhx2*<sup>-/-</sup>;*Lhx9*<sup>-/-</sup> double mutant embryos to test their redundant functions in limb development. Most of the double mutant embryos died around 15.5 dpc with defects in both the forelimbs and the hindlimbs, and such limb defects were progressively more severe distally. The zeugopod (radius and ulna

or tibia and fibula) and autopod (carpals/tarsals, metacarpals/metatarsals and digits) were severely shortened and only two or three digits had formed (Fig. 2A). These digits, especially in the forelimb, did not have clear identities, as carpal/tarsal bones were fused and the number of phalanges was reduced. The *Lhx2*<sup>-/-</sup>;*Lhx9*<sup>+/-</sup> and *Lhx2*<sup>+/-</sup>;*Lhx9*<sup>-/-</sup> mutants developed largely normal limbs (Fig. 2A; data not shown) except that distal phalanges were slightly shorter. These results indicate that *Lhx2* and *Lhx9* play equivalent and redundant roles in mouse limb development and that one gene copy of either *Lhx2* or *Lhx9* is sufficient to regulate PD limb outgrowth and AP limb patterning.

To further test whether *Lmx1b*, and possibly other LIM-HD genes, can function like *Lhx2* and *Lhx9* in the dorsal limb mesenchyme, we reduced the activities of all LIM-HD genes in the developing limb bud by inactivating *Ldb1* specifically in the developing limb bud. We generated the *Ldb1*<sup>cre</sup>;*T-Cre* mice by crossing mice carrying a floxed *Ldb1* allele (Zhao et al., 2007) with *T-Cre* mice. *T-Cre* activity results in recombination in the mesoderm of the primitive streak and has been useful to bypass gastrulation defects, thereby resulting in embryos with mesodermal lineages that carry specific *Cre*-induced gene inactivation (Perantoni et al., 2005; Verheyden et al., 2005). As the limb bud mesenchyme is derived from mesoderm, *Ldb1*<sup>cre</sup>;*T-Cre* mice should lack *Ldb1* activity in this tissue. At 11.5 dpc, *Ldb1* expression in the *Ldb1*<sup>cre</sup>;*T-Cre* limb bud was absent in most cells of the hindlimb mesenchyme, whereas expression in the ectoderm was not affected (see Fig. S1A in the supplementary material). The *Ldb1*<sup>cre</sup>;*T-Cre* embryos exhibited similar, yet slightly more severe, limb defects compared with those in the *Lhx2*<sup>+/-</sup>;*Lhx9*<sup>+/-</sup> double mutant embryos (Fig. 2B). We focused subsequent studies on the hindlimb as the forelimb phenotype of the *Ldb1*<sup>cre</sup>;*T-Cre* embryos was weaker (Fig. 2B) because more cells there have escaped *Cre*-mediated *Ldb1* inactivation.

The hindlimb zeugopod and tarsal region of 15.5 dpc *Ldb1*<sup>cre</sup>;*T-Cre* mutant embryos were more reduced compared with those in the *Lhx2*<sup>-/-</sup>;*Lhx9*<sup>-/-</sup> double mutant embryos (Fig. 2B). The autopod had only two or three digits, resembling the *Lhx2*<sup>-/-</sup>;*Lhx9*<sup>+/-</sup> double mutant limb (Fig. 2B). The tarsal region was fused and the digits left might be digit 1 and 4 according to their morphology and positions (Zhu et al., 2008). It appears that the phenotype in the *Ldb1*<sup>cre</sup>;*T-Cre* limbs is somewhat less severe (see Fig. S2B and S3 in the supplementary material) because some cells had escaped recombination in the *Ldb1*<sup>cre</sup>;*T-Cre* hindlimb buds and, as a result, a residual amount of *Ldb1*-positive (*Ldb1*<sup>+</sup>) cells formed patches in the distal limb bud at 12.5 dpc (see Fig. S1 in the supplementary material).

Importantly, expression of the dorsal limb marker *Lmx1b* was normal at 10.5 dpc but missing in patches of the dorsal limb bud at 12.5 dpc (see Fig. S2A in the supplementary material), suggesting partial ventralization of the *Ldb1*<sup>cre</sup>;*T-Cre* limb. We reasoned that *Ldb1* deficiency would lead to impaired *Lmx1b* function, ultimately resulting in loss of dorsal cell fate and then of *Lmx1b* expression. The DV patterning defect of the *Ldb1*<sup>cre</sup>;*T-Cre* hindlimb bud and the similarities between its limb phenotype and that of the *Lhx2*<sup>-/-</sup>;*Lhx9*<sup>-/-</sup> embryos indicated that *Lhx2*, *Lhx9* and *Lmx1b* are the major LIM-HD factors that act together with *Ldb1* in regulating limb development.

### ***Lhx2*, *Lhx9* and their co-factor *Ldb1* are required for AP limb patterning by controlling *Shh* expression**

To understand the molecular mechanism underlying the defects in the *Lhx2*<sup>-/-</sup>;*Lhx9*<sup>-/-</sup> and *Ldb1*<sup>cre</sup>;*T-Cre* limbs, expression of key regulatory genes in early limb patterning and growth along the PD,

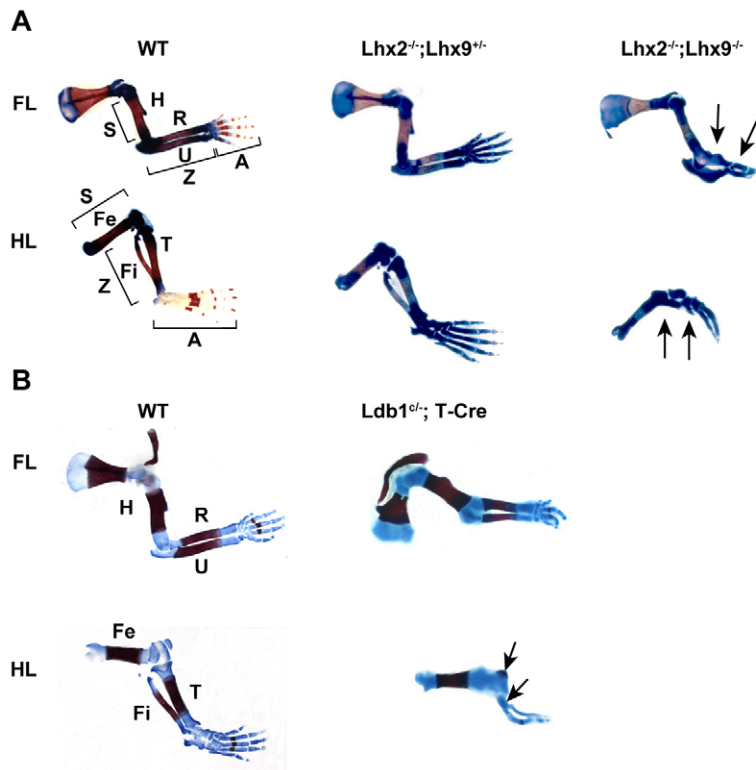

**Fig. 2. Limb defects in the *Lhx2*<sup>-/-</sup>;*Lhx9*<sup>-/-</sup> and *Ldb1*<sup>c/-</sup>;*T-Cre* embryos.** Limb skeletal preparations of mouse embryos are shown. (A) At 15.5 dpc, only *Lhx2*<sup>-/-</sup>;*Lhx9*<sup>-/-</sup> mutant limbs showed severely shortened zeugopod and autopod (arrows), and fewer digits in both the forelimb and the hindlimb. (B) At 15.5 dpc, *Ldb1*<sup>c/-</sup>;*T-Cre* mutant hindlimb showed severely shortened zeugopod and autopod (arrows) and fewer digits. The phenotype in the hindlimb was more severe than that in the forelimb. FL, forelimb; HL, hindlimb; H, humerus; R, radius; U, ulna; Fe, femur; T, tibia; Fi, fibula; S, stylopod; Z, zeugopod; A, autopod.

AP and DV axes were examined. As digit number is reduced when *Shh* activity is reduced or removed later in the limb bud (Lewis et al., 2001; Zhu et al., 2008), we examined *Shh* expression in the *Lhx2*<sup>-/-</sup>;*Lhx9*<sup>-/-</sup> and *Ldb1*<sup>c/-</sup>;*T-Cre* embryos. In the *Lhx2*<sup>-/-</sup>;*Lhx9*<sup>-/-</sup> mutant, there was a progressive loss of *Shh* expression in the ZPA (Fig. 3A). *Shh* expression was normal before 10.0 dpc (data not shown). Starting at 10.5 dpc, *Shh* expression was significantly reduced in the forelimb, whereas, in the hindlimb, decreased *Shh* expression was less pronounced. This may be due to a time lag between the onset of forelimb and hindlimb development. Reduced *Shh* expression was confirmed by reduced expression of patched 1 (*Ptch1*), a transcription target of Hedgehog signaling (Fig. 3A) (Goodrich et al., 1996; Marigo et al., 1996). In the *Ldb1*<sup>c/-</sup>;*T-Cre* mutant limb bud, *Shh* expression was diminished at 10.75 dpc in the hindlimb bud (Fig. 3B). This was confirmed by reduced expression of *Gli1*, another transcription target of Hedgehog signaling (Fig. 3B). The expression of *Fgf4*, also regulated by *Shh* signaling, was lost in the AER of the mutant limb bud (Fig. 3B). In addition, bone morphogenetic protein 4 (*Bmp4*), which requires *Shh* signaling to be expressed at the normal level (Chiang et al., 2001; Lewis et al., 2001), was reduced in expression in the anterior limb bud and AER (Fig. 3B). Consistent with the reduced *Shh* expression, the distal limb bud was noticeably narrower along the AP axis by 11.5 dpc in the *Lhx2*<sup>-/-</sup>;*Lhx9*<sup>-/-</sup> and *Ldb1*<sup>c/-</sup>;*T-Cre* mutant, ultimately leading to fewer digits.

### **Lhx2, Lhx9 and their co-factor Ldb1 are required for the response to Shh signaling by regulating *Grem1* expression**

As *Shh* signaling regulates *Fgf4* expression in the AER through *Grem1*, which encodes a secreted Bmp inhibitor (Zuniga et al., 1999), we next examined *Grem1* expression in the *Lhx2*<sup>-/-</sup>;*Lhx9*<sup>-/-</sup> and *Ldb1*<sup>c/-</sup>;*T-Cre* mutant limb buds. In both cases, *Grem1* expression was significantly reduced compared with the control

(Fig. 3C). Strikingly, the symmetrical expression pattern of *Grem1* in dorsal and ventral limb mesenchyme was disrupted in the *Lhx2*<sup>-/-</sup>;*Lhx9*<sup>-/-</sup> mutant limb bud (Fig. 3D). Although *Grem1* expression in the dorsal limb mesenchyme was reduced, its expression was almost completely lost in the ventral limb mesenchyme of the *Lhx2*<sup>-/-</sup>;*Lhx9*<sup>-/-</sup> mutant embryo. By contrast, the expression pattern of *Lmx1b* appeared unchanged, indicating that DV limb patterning was not altered in the *Lhx2*<sup>-/-</sup>;*Lhx9*<sup>-/-</sup> mutant limb bud. Therefore, the more pronounced loss of *Grem1* expression in the ventral limb is not a consequence of defects in DV limb patterning. These results raised an interesting possibility that the residual *Grem1* expression in the dorsal limb mesenchyme is maintained by a dorsal-specific transcription factor that is partially redundant with *Lhx2* and *Lhx9*, which can conceivably be *Lmx1b*. As *Lmx1b* function was also compromised in the *Ldb1*<sup>c/-</sup>;*T-Cre* limb bud, we reasoned that *Grem1* expression should be lost to similar levels in both dorsal and ventral limb mesenchyme in the *Ldb1*<sup>c/-</sup>;*T-Cre* limb bud, and this was indeed the case (Fig. 3E). As *Lmx1b* is the only dorsal-specific LIM-HD factor in the developing mouse limb, our results suggest that *Lmx1b* can substitute for the function of *Lhx2* and *Lhx9* to a certain extent in the dorsal limb mesenchyme by regulating the expression of *Grem1* and possibly other signaling factors.

To test whether reduced *Grem1* expression in the *Ldb1*<sup>c/-</sup>;*T-Cre* and *Lhx2*<sup>-/-</sup>;*Lhx9*<sup>-/-</sup> mutant limb buds resulted from reduced *Shh* expression or *Shh* signaling activity, we inserted *Shh*-coated beads into the hindlimb buds of the *Shh*<sup>-/-</sup>, *Ldb1*<sup>c/-</sup>;*T-Cre* and *Lhx2*<sup>-/-</sup>;*Lhx9*<sup>-/-</sup> mutants, as well as wild-type embryos and compared *Grem1* expression levels. Although *Shh* beads upregulated *Grem1* expression in the *Shh*<sup>-/-</sup> limb bud, they failed to do so in the *Ldb1*<sup>c/-</sup>;*T-Cre* and *Lhx2*<sup>-/-</sup>;*Lhx9*<sup>-/-</sup> mutant hindlimb bud (Fig. 4A,B). In addition, *Shh* beads in the anterior limb bud of the wild-type and *Lhx2*<sup>-/-</sup>;*Lhx9*<sup>-/-</sup> embryos expanded *Fgf4* expression in the AER, but failed to do so in the *Lhx2*<sup>-/-</sup>;*Lhx9*<sup>-/-</sup> mutant limb

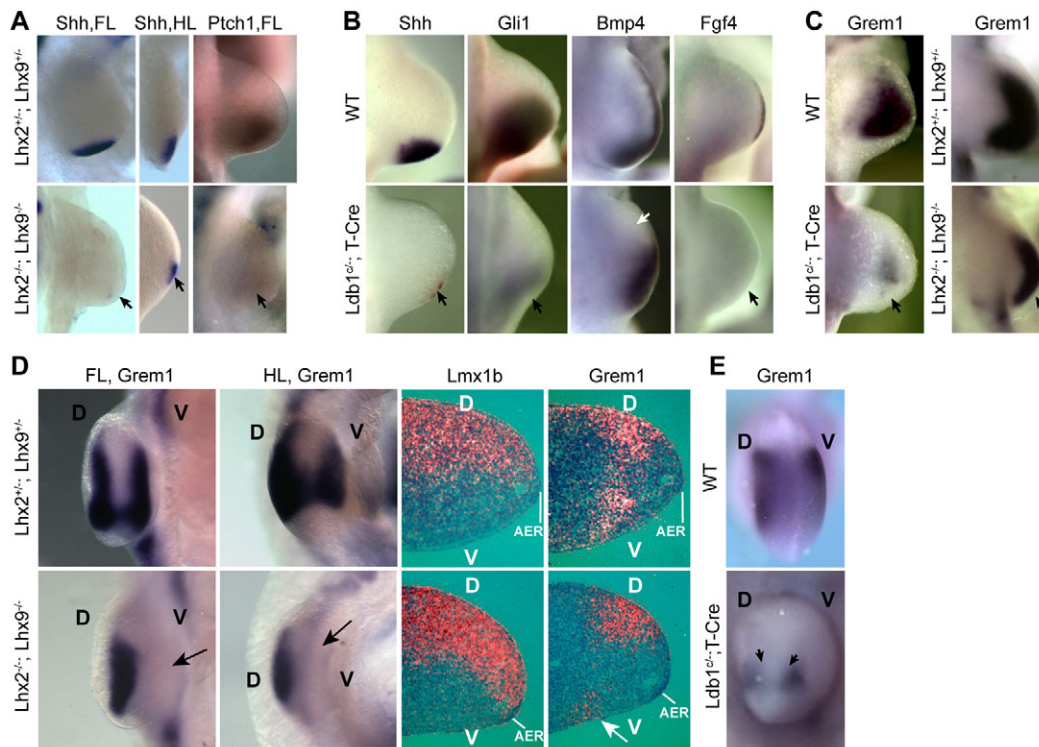

**Fig. 3. Shh expression and response were impaired in the *Lhx2*<sup>-/-</sup>;*Lhx9*<sup>-/-</sup> and *Ldb1*<sup>cl-/-</sup>;*T-Cre* limbs.** Whole-mount in situ hybridization was performed to examine gene expression. In situ hybridization with the <sup>35</sup>S-labelled probes of *Lmx1b* and *Grem1* was performed on limb sections at 10.5 dpc. (A) Expression of indicated genes in the 10.5 dpc *Lhx2*<sup>-/-</sup>;*Lhx9*<sup>-/-</sup> limbs. Reduced gene expression in the mutant limbs is indicated by arrows. FL, forelimb; HL, hindlimb. (B) Expression of indicated genes in the 10.75 dpc *Ldb1*<sup>cl-/-</sup>;*T-Cre* hindlimb. (C) Significantly reduced *Grem1* expression in the 10.5 dpc hindlimb of the *Ldb1*<sup>cl-/-</sup>;*T-Cre* embryo and the 10.5 dpc forelimb of the *Lhx2*<sup>-/-</sup>;*Lhx9*<sup>-/-</sup> embryo. In A-C, reduced gene expression in the mutant limbs is indicated by arrows. (D) Loss of *Grem1* expression was more severe in the ventral limb bud of the *Lhx2*<sup>-/-</sup>;*Lhx9*<sup>-/-</sup> embryo (arrow). *Lmx1b* expression in the dorsal limb was not altered in the *Lhx2*<sup>-/-</sup>;*Lhx9*<sup>-/-</sup> limb. (E) *Grem1* expression was similarly lost in both dorsal and ventral *Ldb1*<sup>cl-/-</sup>;*T-Cre* hindlimb bud at 11.0 dpc (arrow). D, dorsal; V, ventral. AER, apical ectodermal ridge.

bud (Fig. 4C). However, *Ptch1* expression was similarly induced by the Shh beads in both wild-type and *Ldb1*<sup>cl-/-</sup>;*T-Cre* mutant hindlimb bud (Fig. 4D). These results indicate that Shh activation of *Grem1* expression, rather than Shh signal transduction itself, requires LIM-HD/Ldb1 activities. Thus, Ldb1, in conjunction with the LIM-HD transcription factors expressed in the limb bud, acts in limb mesenchymal cells to control the production of some output signals in response to Shh, such as *Grem1*.

### **Lhx2, Lhx9 and their co-factor Ldb1 are required for PD limb outgrowth by regulating *Fgf10* expression**

*Lhx2* and *Lhx9* expression in the distal limb bud resembles that of *Fgf10* (Ohuchi et al., 1997), which is required for PD limb outgrowth (Min et al., 1998; Sekine et al., 1999). *Fgf10* and other Fgfs expressed in the AER, mainly *Fgf8*, regulate each other's expression, and such reciprocal regulation primarily controls PD limb outgrowth. At 9.5 dpc when the hindlimb bud is initiated, expression of *Fgf10* was normal in the *Ldb1*<sup>cl-/-</sup>;*T-Cre* mutant compared with the wild-type control (Fig. 5A). However, *Fgf10* expression was rapidly reduced during successive stages of limb development. Shortly after limb initiation, *Fgf10* expression began to disappear in patches in the distal forelimb at 9.5 dpc (Fig. 5A). At 10.25 dpc and 10.5 dpc, *Fgf10* expression was much reduced (Fig. 5A). Surprisingly, the distal expression of sprouty 4 (*Spry4*), a transcription target of Fgf signaling (Minowada et al., 1999), was

almost normal in the *Ldb1*<sup>cl-/-</sup>;*T-Cre* hindlimb bud at 10.5 dpc and 11.5 dpc (Fig. 5B and data not shown), suggesting that in the to *Ldb1*<sup>cl-/-</sup>;*T-Cre* hindlimb, *Fgf8* signaling is transduced at normal levels, but unable to maintain *Fgf10* expression. In the *Lhx2*<sup>-/-</sup>;*Lhx9*<sup>-/-</sup> mutant limb bud, we also observed reduction of *Fgf10* expression, although not as severe as that in the *Ldb1*<sup>cl-/-</sup>;*T-Cre* limb bud (Fig. 5A).

*Fgf8* expression was detected in the AER in the *Ldb1*<sup>cl-/-</sup>;*T-Cre* limb bud at 10.25 dpc, but its expression domain was thinner and truncated posteriorly (Fig. 5C). In the *Lhx2*<sup>-/-</sup>;*Lhx9*<sup>-/-</sup> mutant, *Fgf8* expression was also lost in the posterior AER, but this happens at a slightly later developmental stage (Fig. 5D). At 10.5 dpc, in the *Ldb1*<sup>cl-/-</sup>;*T-Cre* mutant limb, *Fgf8* expression in the AER became very spotty and the AER was completely flattened by 11.5 dpc (Fig. 5C). These results indicate that *Lhx2*, *Lhx9* and *Ldb1* are not required for the initial expression of *Fgf10* and *Fgf8*, but they are likely to mediate the positive-feedback loop between *Fgf10* and *Fgf8* by regulating *Fgf10* expression in the limb mesenchyme in response to Fgf8 signaling.

The distal limb bud of the *Ldb1*<sup>cl-/-</sup>;*T-Cre* embryo at 11.5 dpc still expressed *Lhx9*, which marks the distal domain (Fig. 5E), indicating that loss of *Fgf10* expression later in limb development did not result in loss of distal limb bud cells. However, when the zeugopod and autopod skeletal primordia were detected by *Sox9* in situ hybridization at 12.5 dpc, both were much smaller, and distal chondrogenesis was much reduced in the *Ldb1*<sup>cl-/-</sup>;*T-Cre* mutant limb

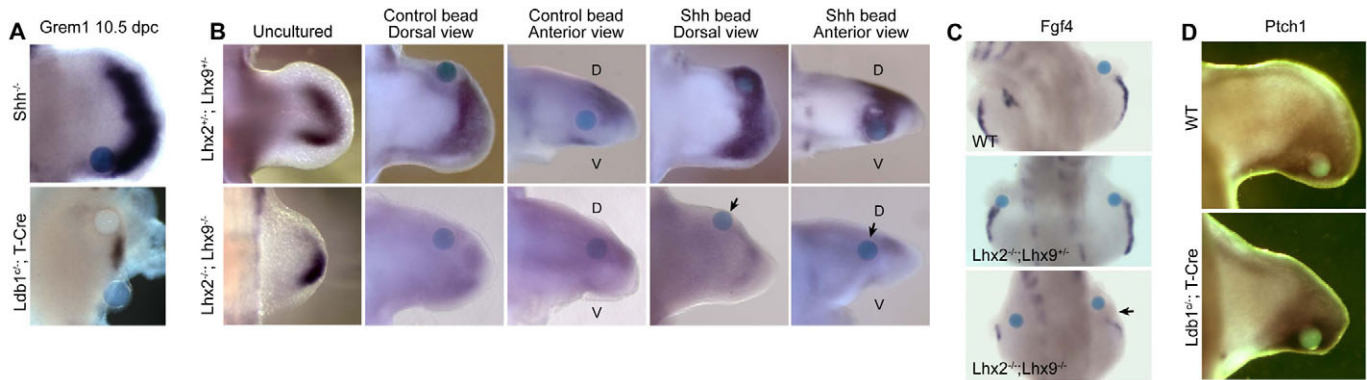

**Fig. 4. Regulation of *Grem1* expression by *Shh* was impaired in the *Lhx2*<sup>-/-</sup>/*Lhx9*<sup>-/-</sup> and *Ldb1*<sup>c/-</sup>/*T-Cre* limbs. (A)** *Shh*-coated beads were implanted into the hindlimb buds at 10.5 dpc and *Grem1* expression was examined. **(B)** *Grem1* expression was reduced in the 10.5 dpc *Lhx2*<sup>-/-</sup>/*Lhx9*<sup>-/-</sup> hindlimb bud, most notably in the posterior part. Ectopic *Grem1* expression in the anterior limb bud was induced by *Shh* beads in the control *Lhx2*<sup>+/-</sup>/*Lhx9*<sup>+/-</sup> limb, but not in the *Lhx2*<sup>-/-</sup>/*Lhx9*<sup>-/-</sup> limb (arrows). Control beads were inserted to the contralateral limb buds. D, dorsal; V, ventral. **(C)** *Shh*-coated beads were implanted into 10.25 dpc forelimb buds and *Fgf4* expression was not induced in the *Lhx2*<sup>-/-</sup>/*Lhx9*<sup>-/-</sup> limb (arrow). **(D)** *Shh*-coated beads were implanted into the hindlimb buds at 11.0 dpc. *Ptch1* expression was upregulated in the *Ldb1*<sup>c/-</sup>/*T-Cre* and wild-type limb buds.

(Fig. 5F). As premature AER loss due to AER specific removal of fibroblast growth factor receptor 2 (*Fgf2*) delayed generation of above threshold number of progenitors required to form normal autopod skeletons (Lu et al., 2008; Yu and Ornitz, 2008), reduced autopod skeleton formation in the *Ldb1*<sup>c/-</sup>/*T-Cre* mutant limb bud may also be a result of reduced limb progenitor cells owing to reduced *Fgf* and *Shh* signaling.

### **Lhx2, Lhx9, Lmx1b and their co-factor Ldb1 integrate limb patterning and growth along all three axes**

The growth and patterning defects along the AP, DV and PD axes in the *Ldb1*<sup>c/-</sup>/*T-Cre* mutant limb suggest that *Lhx2*, *Lhx9*, *Lmx1b* and their co-factor *Ldb1* coordinate limb patterning and growth along all three axes. To test this hypothesis, we first inserted *Fgf8*-coated beads into the hindlimb mesenchyme. *Fgf8* beads upregulated *Fgf10* expression in the control limb bud, but failed to maintain or activate *Fgf10* expression in the *Ldb1*<sup>c/-</sup>/*T-Cre* hindlimb (Fig. 6A). By contrast, *Fgf10* beads rescued *Fgf8* expression in the AER of the *Ldb1*<sup>c/-</sup>/*T-Cre* and *Lhx2*<sup>-/-</sup>/*Lhx9*<sup>-/-</sup> limb buds (Fig. 6B,C), indicating that one of the primary defects in the *Ldb1*<sup>c/-</sup>/*T-Cre* and *Lhx2*<sup>-/-</sup>/*Lhx9*<sup>-/-</sup> limb buds was reduced *Fgf10* expression. Furthermore, *Fgf8* beads induced *Spry4* expression around the beads in the 10.5 dpc *Ldb1*<sup>c/-</sup>/*T-Cre* limb bud (Fig. 6D). This finding is consistent with the normal *Spry4* expression in the *Ldb1*<sup>c/-</sup>/*T-Cre* hindlimb bud (Fig. 5B). When cell death was examined in the cultured limb bud by whole-mount TUNEL assay (see Fig. S4 in the supplementary material), no difference was found between cultured wild-type and *Ldb1*<sup>c/-</sup>/*T-Cre* hindlimb buds. Thus, weakened or loss of gene expression in the mutant cultured limb bud is not a result of excessive cell death. Our results confirm that *Fgf8* signal itself is transduced at normal levels in the *Ldb1*<sup>c/-</sup>/*T-Cre* limb bud and that the LIM-HD factors are required in the positive-feedback loop to regulate *Fgf10* expression.

Next, we tested whether the LIM-HD factors are also required in the positive-feedback loop between *Fgf* signaling from the AER and *Shh* expression in the ZPA. In the *Shh*<sup>-/-</sup> mutant limb, PD limb outgrowth was reduced with prematurely degenerated AER and reduced *Fgf8* expression (Chiang et al., 2001). The zeugopod phenotype of *Shh*<sup>-/-</sup> mutant (Chiang et al., 2001) is similar to that of the *Ldb1*<sup>c/-</sup>/*T-Cre* limb. To test whether *Ldb1* also acts to maintain

*Shh* expression in response to *Fgf* signaling from the AER, we inserted *Fgf8*-coated beads into the posterior hindlimb mesenchyme of 10.5 dpc embryos. *Fgf8* beads expanded *Shh* expression domain in the control hindlimb (Fig. 6E), but failed to do so in the *Ldb1*<sup>c/-</sup>/*T-Cre* mutant (Fig. 6E). We did notice that small patches of distal limb bud cells under the AER and around the *Fgf8* bead expressed *Shh* in the *Ldb1*<sup>c/-</sup>/*T-Cre* mutant. These are probably the *Ldb1*<sup>+</sup> cells that have escaped recombination by the *T-Cre* and can therefore respond to the recombinant *Fgf8*. As *Grem1* also plays an essential role in limb mesenchymal-epithelial signaling interactions, and both A-P and P-D limb defects were observed in the *Grem1*<sup>-/-</sup> limb bud (Khokha et al., 2003; Michos et al., 2004), another mechanism used by *Lhx2*, *Lhx9*, *Lmx1b* and *Ldb1* to coordinate limb development along the AP and PD axes is to regulate *Grem1* expression in response to *Shh* signaling (Fig. 3C).

### **Ldb1 is required to maintain cell proliferation in the limb bud**

The smaller limb sizes in the *Lhx2*<sup>-/-</sup>/*Lhx9*<sup>-/-</sup> and *Ldb1*<sup>c/-</sup>/*T-Cre* embryos suggest that *Ldb1* in conjunction with the transcriptional regulators that depend on this co-factor, regulates cell proliferation and/or cell survival. To test this, we examined cell proliferation and cell death in the hindlimb bud of the *Ldb1*<sup>c/-</sup>/*T-Cre* embryos. At early stages (i.e. 10.5 dpc) of development, cell proliferation was similar throughout the entire limb bud. We observed a significant reduction of cell proliferation in the *Ldb1*<sup>c/-</sup>/*T-Cre* embryos (Fig. 7A,B). By 11.5 dpc, cell proliferation progressively reduces in the distal to proximal direction in the wild-type limb bud. In the mutant limb bud, there was a significant reduction in cell proliferation in all regions of the limb (Fig. 7A,B). We did not detect significant difference of cell death in most regions of the limb between the mutant and wild type (Fig. 7C). However, consistent with reduced *Fgf* signaling from the AER, we found that cell death was slightly increased in the proximal limb bud of the *Ldb1*<sup>c/-</sup>/*T-Cre* mutant (Fig. 7C).

### **DISCUSSION**

Our report is focused on transcriptional regulation in response to cell-cell signaling that controls limb patterning and outgrowth. We show that the LIM-HD transcription factors *Lhx2* and *Lhx9* play redundant roles to integrate limb outgrowth and patterning along the

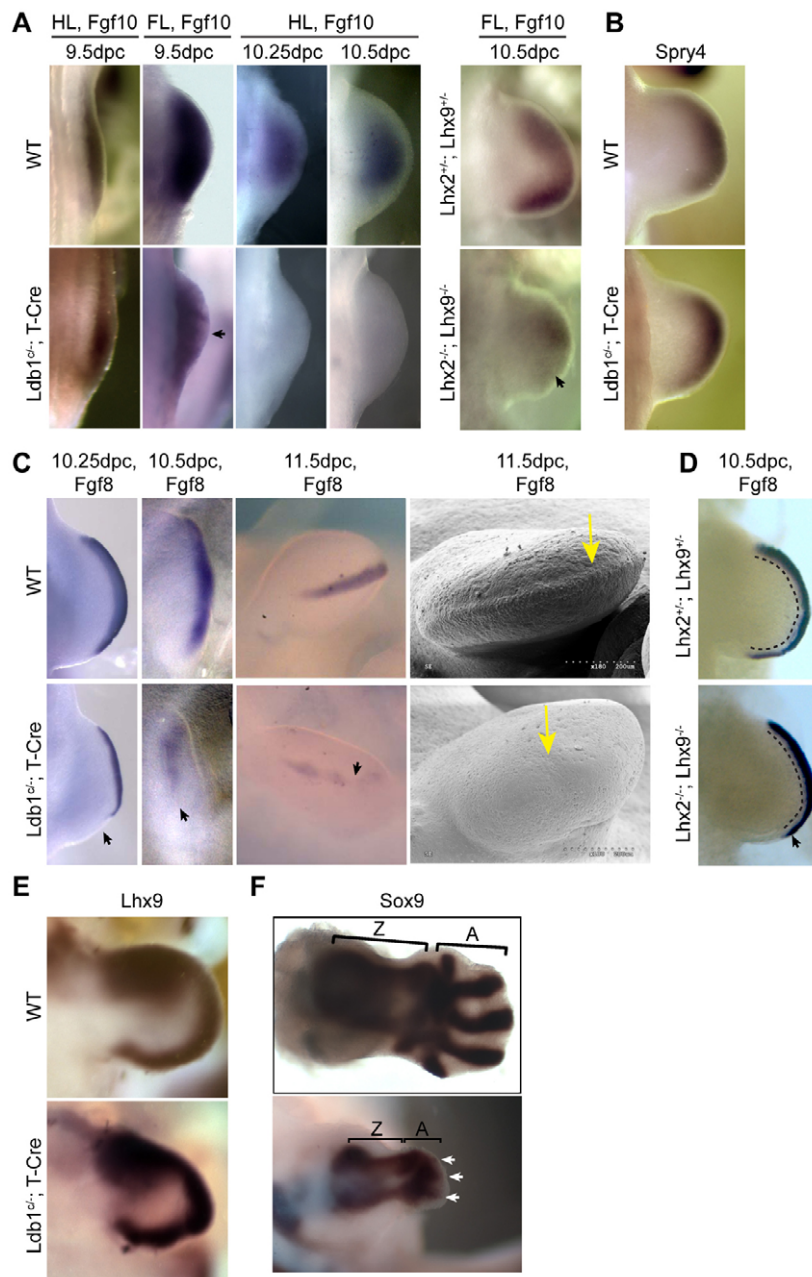

**Fig. 5. Reduced *Fgf10* and *Fgf8* expression in the *Lhx2*<sup>-/-</sup>;*Lhx9*<sup>-/-</sup> and *Ldb1*<sup>c-/-</sup>;*T-Cre* limbs.** Whole-mount in situ hybridization was performed. **(A)** *Fgf10* expression was rapidly lost in the mutant limb bud. Loss of *Fgf10* expression was first observed in the distal-most limb bud (arrow). Loss of *Fgf10* expression in the *Lhx2*<sup>-/-</sup>;*Lhx9*<sup>-/-</sup> hindlimb bud was less significant (arrow). **(B)** *Spry4* was expressed almost normally in the *Ldb1*<sup>c-/-</sup>;*T-Cre* mutant hindlimb bud at 10.5 dpc. **(C)** *Fgf8* expression was progressively reduced in the AER of the *Ldb1*<sup>c-/-</sup>;*T-Cre* hindlimb bud (black arrows). The AER was completely flattened (yellow arrows) at 11.5 dpc, as shown by the scanning EM. **(D)** *Fgf8* expression was lost in the posterior AER of the *Lhx2*<sup>-/-</sup>;*Lhx9*<sup>-/-</sup> forelimb bud at 10.5 dpc (arrow and broken line). **(E)** *Lhx9* expression in the 11.5 dpc hindlimb. **(F)** *Sox9* expression in the 12.5 dpc hindlimb bud. Small *Sox9*-expressing domains the *Ldb1*<sup>c-/-</sup>;*T-Cre* mutant are indicated by arrows. Z, zeugopod; A, autopod.

PD and AP axes by regulating the expression of the crucial signaling molecules *Shh*, *Grem1* and *Fgf10* in the posterior distal limb mesenchyme (Fig. 7D). In addition, by removing *Lhx2* and *Lhx9*, we uncovered a previously undescribed role of the dorsal determinant *Lmx1b*. In our mutants, it can partially substitute for the function of *Lhx2* and *Lhx9* in regulating AP and PD limb patterning and outgrowth through *Grem1* (Fig. 7D). Furthermore, conditional inactivation of *Ldb1*, an essential co-factor of LIM-HD genes, causes additional phenotypes that affect limb development not only along the PD and AP, but also the DV axis. Curtailing *Ldb1* function in the limb bud leads to signaling defects that can be ascribed to the malfunction of several LIM-HD factors, including *Lhx2*, *Lhx9* and *Lmx1b*. Our data revealed that *Ldb1* and the associated LIM-HD transcription factors act in concert to integrate the signal exchange between limb mesenchyme and ectoderm that regulates limb growth and patterning along all three axes.

### LIM-HD transcription factors act as a central integrator for patterning and growth along the three axes of the limb

Crosstalk among the signaling centers that control limb development along the PD, AP and DV axes have been previously identified as a signal relay in which a cell receives a signal and emits its own signal(s) to elicit responses in neighboring cells. It was unknown prior to our study how such signal relays were transcriptionally controlled. We show that a transcriptional complex whose essential elements include *Ldb1* and LIM-HD protein is instrumental in controlling signaling interactions and integrations in the early limb bud. *Shh* and *Fgf10* expression in response to *Fgf8* signaling and *Grem1* expression in response to *Shh* signaling are controlled by the same family of transcription factors directly or indirectly (Fig. 7D). Therefore, *Ldb1*, together with a select group of LIM-HD transcription factors, acts as a central intracellular integrator to

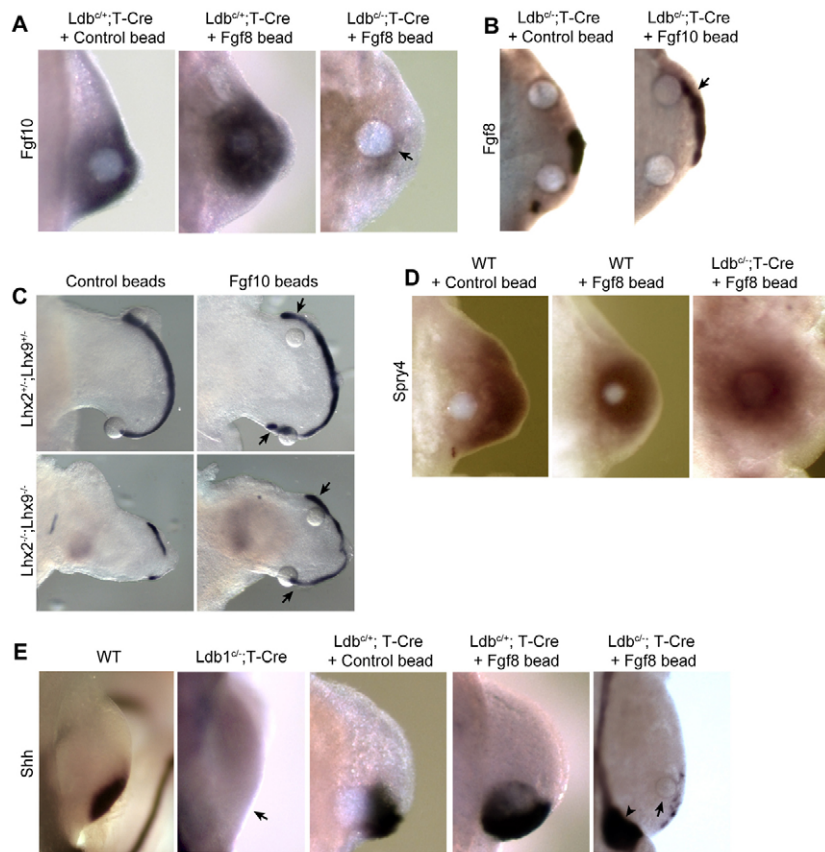

**Fig. 6. Production of output signals in response to Fgf8 signaling is disrupted in the *Ldb1<sup>cl-/-</sup>;T-Cre* and *Lhx2<sup>-/-</sup>;Lhx9<sup>-/-</sup>* mutant limb buds.**

(A) The Fgf8-soaked bead implanted in the 10.5 dpc hindlimb failed to upregulate *Fgf10* expression in the *Ldb1<sup>cl-/-</sup>;T-Cre* mutant limb (arrow). (B) Fgf10-soaked beads, but not control beads, rescued *Fgf8* expression in the AER of the *Ldb1<sup>cl-/-</sup>;T-Cre* mutant limb (arrow). Beads were implanted into the 10.5 dpc hindlimb bud. Ventral view of the limbs is shown. (C) Fgf10-soaked beads, but not control beads, rescued *Fgf8* expression in the AER of the *Lhx2<sup>-/-</sup>;Lhx9<sup>-/-</sup>* forelimb bud mutant limb (arrows). Beads were implanted into the 11.0 dpc forelimb bud. Dorsal view of the limbs is shown. Control beads fell off in the *Lhx2<sup>-/-</sup>;Lhx9<sup>-/-</sup>* forelimb bud during the in situ hybridization procedure. (D) Fgf8-soaked beads implanted into the 10.5 dpc hindlimb bud induced *Spry4* expression in both *Ldb1<sup>cl-/-</sup>;T-Cre* mutant and wild-type limb buds. (E) At 10.25 dpc, loss of *Shh* expression in the hindlimb of the *Ldb1<sup>cl-/-</sup>;T-Cre* mutant embryo (arrow) was not rescued by the implanted Fgf8-soaked bead. Only small patches of *Shh* expression were detected around the Fgf8-soaked bead and under the AER. *Shh* expression in the hindgut is indicated by an arrowhead.

coordinate limb development along all three axes by mediating at least two distinct signaling feedback loops: Shh-AER and Fgf10-Fgf8 (Fig. 7D). This is quite intriguing because Shh and Fgfs signal through completely different intracellular pathways that can be distinguished by their well-established signaling read-outs. The Ldb1/LIM-HD transcription complex appears to control some specific responses to Shh and Fgf8 signaling, rather than regulating these signaling activities per se in the limb bud mesenchyme. Thus, one system the limb bud has employed is a remarkably efficient signaling integration strategy, whereby LIM-HD/Ldb1 factors act as a central node in the distal limb mesenchymal cells. This central node first receives signaling inputs from any one of the three axes and subsequently controls the production of signals that can regulate patterning and growth along other axes. One possibility is that LIM-HD/Ldb1 factors regulate expression of some downstream genes of both Fgf and Shh signaling. However, one cannot rule out that some or even all of these regulations may be indirect. As the expression of *Shh*, *Grem1* and *Fgf10* in the mesenchyme gradually decreases as the limb mesenchymal cells differentiate, it is possible that the LIM-HD transcription factors and co-factors may also maintain limb progenitor cell states by regulating responses to AER-Fgfs and Shh. Recent studies have shown that both Fgf and Shh signaling act to sustain progenitor pools required for proper limb patterning and growth (Lu et al., 2008; Mariani et al., 2008; Towers et al., 2008; Yu and Ornitz, 2008; Zhu et al., 2008). Entirely compatible with this idea is our observation that *Lhx2* and *Lhx9* expression was lost in the older distal limb bud when chondrogenesis started (Fig. 1). Furthermore, *Lhx2* has been shown to control an early progenitor cell state during hair follicle formation or in the hematopoietic system (Rhee et al., 2006).

### Growth and patterning signals are integrated in the distal limb mesenchyme

*Lhx2* and *Lhx9* are expressed throughout the early limb bud. Later in limb development, their expression is restricted to the distal limb mesenchyme (Fig. 1). *Lmx1b* expression overlaps with that of *Lhx2* and *Lhx9* in the dorsal limb bud. The distal limb mesenchyme is the location where signaling inputs from the AER (Fgf8), ZPA (Shh) and the dorsal ectoderm (Wnt7a) are integrated. The LIM-HD transcription factors *Lhx2*, *Lhx9* and *Lmx1b*, and possibly additional members of this family, regulate the production of output signals, including Fgf10, Shh and *Grem1* in the limb mesenchyme in response to the integrated signals (Fig. 7D). A fate-mapping study in the early chick limb bud indicates that regionalization along the PD axis progresses in a proximal-to-distal direction. Cells located more distally are less restricted in terms of their final regional identities and thus able to contribute to limb structures that span a larger domain (Sato et al., 2007). Therefore, it appears that more distal limb cells are more expandable and have more plasticity in this regard. This further underscores the likelihood that the LIM-HD factors *Lhx2*, *Lhx9* and *Lmx1b* may regulate a transcription profile required for maintaining a progenitor state and that this profile may also allow the distal limb cells to express downstream genes regulated by Fgf and Shh signals. Our model predicts that, in the absence of *Lhx2* and *Lhx9* function, mesenchymal cells of the limb bud will assume a more determined and regionalized state such that their ability to expand is severely compromised. Indeed, the limb buds were smaller, narrower and limb skeletal segments were either much shorter or missing in the *Lhx2<sup>-/-</sup>;Lhx9<sup>-/-</sup>* and the *Ldb1<sup>cl-/-</sup>;T-Cre* mutant, although zeugopods and autopods still formed. Some elements (i.e. the tarsal bones) were fused together. These



### Fig. 7. Reduced proliferation was detected in the *Ldb1*<sup>Cre</sup>;T-Cre mutant limb.

(A) Analysis of cell proliferation in wild-type and the *Ldb1*<sup>Cre</sup>;T-Cre hindlimb bud by staining the limb sections with the anti-phosphohistone H3 (anti-PHH3) antibodies to show cells in M phase. (B) Stained and total cell numbers were counted in the boxed regions in A of the section from three independent limbs at the same stages. The average percentage of M-phase cells in different samples is shown in B. Reduction of cell proliferation was more severe in the ventral limb. (C) Cell death was analyzed by immunohistochemistry with cleaved caspase 3 antibodies in transverse sections of hindlimb buds at 11.5 dpc. The boxed proximal limb regions are shown at higher magnification underneath. Cell death was increased in the mutant. (D) Model of signaling interactions in the early limb bud mediated by the LIM-HD factors and Ldb1. Our data provide strong evidence that a transcriptional machinery composed of LIM-HD transcription factors Lhx2, Lhx9, Lmx1b and their common co-factor, Ldb1, mediates at least two distinct signaling feedback loops (orange and blue arrows, respectively) between the AER and the underlying mesenchyme of the limb bud. These feedback loops integrate limb growth and patterning along the PD, AP and DV axes. The LIM-HD transcription factors enable Fgf8 emanating from the AER to control *Shh* expression, which in turn governs AER maintenance through *Grem1* expression in the mesenchyme (orange arrows). *Grem1* expression also regulates *Fgf4* expression (stripes) in the posterior AER. Strong Fgf signaling from the AER also inhibits *Grem1* in the mesenchyme under the AER (Verheyden and Sun, 2008). In addition, these transcription factors regulate the feedback loop between *Fgf10* and *Fgf8* expression required for PD limb outgrowth (blue arrows).

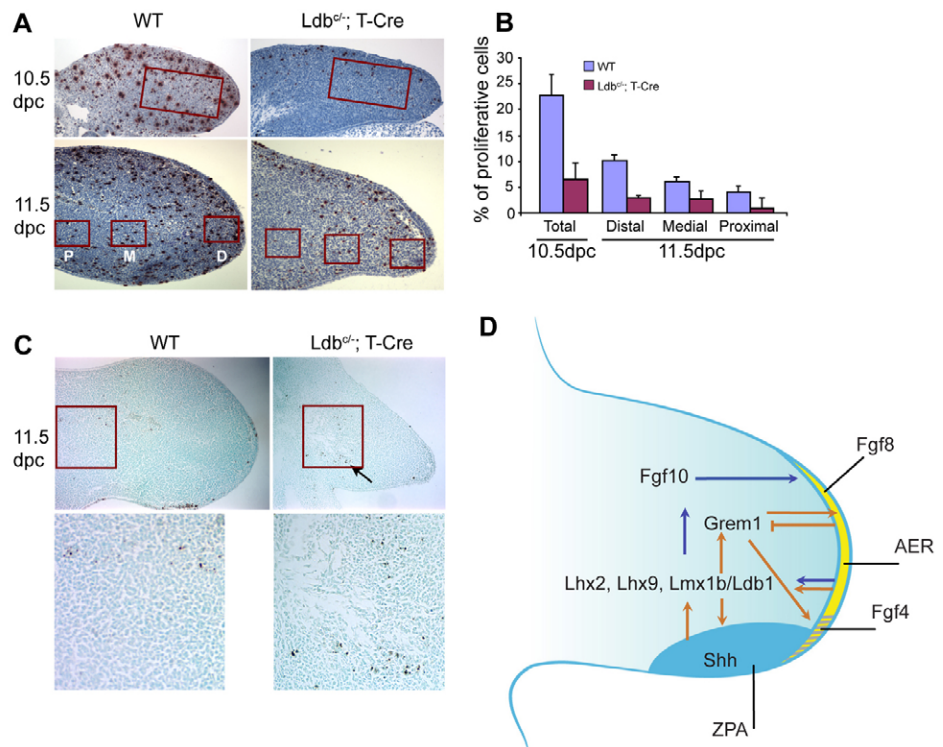

phenotypes are very similar to those observed in the Fgf and Shh signaling-deficient limbs, in which missing skeletal elements are thought to be caused by reduced progenitor cell numbers (Sun et al., 2002; Zhu et al., 2008). However, Fgf8/4 signaling does not control *Lhx2/9* expression (see Fig. S5 in the supplementary material). In addition, in contrast to the *Shh*, *Grem1* and all *Fgf* mutants, reduced cell proliferation, rather than cell death, is the major contributing factor to the small limb phenotypes in the *Ldb1* mutant limb. This may be due to incomplete loss of Shh, Fgf and Grem1 signaling in the *Ldb1* mutant.

It appears that Lhx2 and Lhx9 are the major LIM-HD transcription factors acting in conjunction with Ldb1 to coordinate early limb patterning and outgrowth. This by no means excludes the possibility that additional factors participate in the transcriptional regulation of this process. *Ldb2*, a close family member of *Ldb1*, is also expressed in the developing limb bud (see Table S1 and <http://www.informatics.jax.org/searches/image.cgi?11751>). *Ldb2*<sup>-/-</sup> mice do not have limb defects (H.W., unpublished). However, these two genes may play redundant roles in limb development. Besides mediating the function of the three LIM-HD factors analyzed in this report, they are likely to affect the function of additional Ldb-associated regulators in the developing limb. For example, our RT-PCR analysis (Table S1 in the supplementary material) revealed the presence of appreciable amounts of *Islet1* transcripts at transient stages of early limb bud formation. Also, GATA and Ssdp factors are regularly observed in the context of Ldb/LIM-HD transcriptional activity (van Meyel et al., 2003; Vyas et al., 1999). Furthermore, in the *Twist1*<sup>-/-</sup> limb bud, the Fgf10-Fgf8 feedback loop is also disrupted (Zuniga et al., 2002), raising the possibility that the LIM-HD/Ldb1 factors in the limb may also interact with Twist1.

### Different molecular mechanisms underlie the function of *Lhx2* and *Lhx9* during evolution in limb development

Despite the functional similarity between *ap* in *Drosophila* and *Lhx2*, *Lhx9* and *Lmx1b* in the mouse, the underlying molecular mechanisms by which these transcription factors regulate limb development may not be conserved. In the *Drosophila* wing primordium, *ap* induces the expression of the Notch ligand Serrate in dorsal cells and restricts the expression of Delta, another Notch ligand, to the ventral cells (Diaz-Benjumea and Cohen, 1995; Milan and Cohen, 2000). Serrate and Delta activates Notch signaling. This induces *Wg* expression in cells along the DV boundary, which is required for PD outgrowth (Diaz-Benjumea and Cohen, 1995; Doherty et al., 1996). Limb development in vertebrates is more complicated, as it involves two distinct germ layers: ectoderm and the mesoderm. The ectoderm emits signals (i.e. Wnt7a and Fgf8), whereas the mesoderm responds to these signals by expressing *Lmx1b*, *Shh* and *Fgf10*, which, in turn, control DV, AP and PD limb patterning and outgrowth, respectively. *Lhx2*, *Lhx9* and *Lmx1b* are expressed only in the limb mesenchyme, whereas the action of Notch ligand jagged 2 (a homologue of *Drosophila* Serrate) appears to be mainly confined to the AER, which is an ectodermal structure (Sidow et al., 1997; Valsecchi et al., 1997). Therefore, *Lhx2*, *Lhx9* and *Lmx1b* may not act through controlling the activation of Notch signaling by directly regulating the expression of jagged 2, its major ligand in the developing limb. Rather, a new mechanism may have been evolved in higher vertebrates whereby *Lhx2*, *Lhx9* and *Lmx1b* coordinate three-dimensional limb patterning and outgrowth.

We thank members of the Yang and Westphal laboratories for stimulating discussion, and Julia Fekecs for help with figure preparation. Dr Gail Martin kindly provided the *Spry4* probe. This work was supported by NIH intramural research programs of NHGRI, NICHD and NCI. Deposited in PMC for release after 12 months.

#### Supplementary material

Supplementary material for this article is available at <http://dev.biologists.org/cgi/content/full/136/8/1375/DC1>

#### References

- Agarwal, P., Wylie, J. N., Galceran, J., Arkhitko, O., Li, C., Deng, C., Grosschedl, R. and Bruneau, B. G. (2003). Tbx5 is essential for forelimb bud initiation following patterning of the limb field in the mouse embryo. *Development* **130**, 623-633.
- Agulnick, A. D., Taira, M., Breen, J. J., Tanaka, T., Dawid, I. B. and Westphal, H. (1996). Interactions of the LIM-domain-binding factor Ldb1 with LIM homeodomain proteins. *Nature* **384**, 270-272.
- Barrow, J. R., Thomas, K. R., Boussadia-Zahui, O., Moore, R., Kemler, R., Capecci, M. R. and McMahon, A. P. (2003). Ectodermal Wnt3/beta-catenin signaling is required for the establishment and maintenance of the apical ectodermal ridge. *Genes Dev.* **17**, 394-409.
- Bell, E., Saunders, J. W., Jr and Zwilling, E. (1959). Limb development in the absence of ectodermal ridge. *Nature* **184**, 1736-1737.
- Birk, O. S., Casiano, D. E., Wassif, C. A., Cogliati, T., Zhao, L., Zhao, Y., Grinberg, A., Huang, S., Kreidberg, J. A., Parker, K. L. et al. (2000). The LIM homeobox gene Lhx9 is essential for mouse gonad formation. *Nature* **403**, 909-913.
- Chen, H., Lun, Y., Ovchinnikov, D., Kokubo, H., Oberg, K. C., Pepicelli, C. V., Gan, L., Lee, B. and Johnson, R. L. (1998). Limb and kidney defects in Lmx1b mutant mice suggest an involvement of LMX1B in human nail patella syndrome. *Nat. Genet.* **19**, 51-55.
- Chiang, C., Litingtung, Y., Harris, M. P., Simandl, B. K., Li, Y., Beachy, P. A. and Fallon, J. F. (2001). Manifestation of the limb prepattern: limb development in the absence of sonic hedgehog function. *Dev. Biol.* **236**, 421-435.
- Cohen, B., McGuffin, M. E., Pfeifle, C., Segal, D. and Cohen, S. M. (1992). apterous, a gene required for imaginal disc development in *Drosophila* encodes a member of the LIM family of developmental regulatory proteins. *Genes Dev.* **6**, 715-729.
- Diaz-Benjumea, F. J. and Cohen, S. M. (1993). Interaction between dorsal and ventral cells in the imaginal disc directs wing development in *Drosophila*. *Cell* **75**, 741-752.
- Diaz-Benjumea, F. J. and Cohen, S. M. (1995). Serrate signals through Notch to establish a Wingless-dependent organizer at the dorsal/ventral compartment boundary of the *Drosophila* wing. *Development* **121**, 4215-4225.
- Doherty, D., Feger, G., Younger-Shepherd, S., Jan, L. Y. and Jan, Y. N. (1996). Delta is a ventral to dorsal signal complementary to Serrate, another Notch ligand, in *Drosophila* wing formation. *Genes Dev.* **10**, 421-434.
- Dreyer, S. D., Zhou, G., Baldini, A., Winterpacht, A., Zabel, B., Cole, W., Johnson, R. L. and Lee, B. (1998). Mutations in LMX1B cause abnormal skeletal patterning and renal dysplasia in nail patella syndrome. *Nat. Genet.* **19**, 47-50.
- Goodrich, L. V., Johnson, R. L., Milenkovic, L., McMahon, J. A. and Scott, M. P. (1996). Conservation of the hedgehog/patched signaling pathway from flies to mice: induction of a mouse patched gene by Hedgehog. *Genes Dev.* **10**, 301-312.
- Hasson, P., Del Buono, J. and Logan, M. P. (2007). Tbx5 is dispensable for forelimb outgrowth. *Development* **134**, 85-92.
- Khokha, M. K., Hsu, D., Brunet, L. J., Dionne, M. S. and Harland, R. M. (2003). Gremlin is the BMP antagonist required for maintenance of Shh and Fgf signals during limb patterning. *Nat. Genet.* **34**, 303-307.
- Laufer, E., Nelson, C. E., Johnson, R. L., Morgan, B. A. and Tabin, C. (1994). Sonic hedgehog and Fgf-4 act through a signaling cascade and feedback loop to integrate growth and patterning of the developing limb bud. *Cell* **79**, 993-1003.
- Lewandoski, M., Sun, X. and Martin, G. R. (2000). Fgf8 signalling from the AER is essential for normal limb development. *Nat. Genet.* **26**, 460-463.
- Lewis, P. M., Dunn, M. P., McMahon, J. A., Logan, M., Martin, J. F., St-Jacques, B. and McMahon, A. P. (2001). Cholesterol modification of sonic hedgehog is required for long-range signaling activity and effective modulation of signaling by Ptc1. *Cell* **105**, 599-612.
- Loomis, C. A., Harris, E., Michaud, J., Wurst, W., Hanks, M. and Joyner, A. L. (1996). The mouse *Engrailed-1* gene and ventral limb patterning. *Nature* **382**, 360-363.
- Lu, P., Yu, Y., Perdue, Y. and Werb, Z. (2008). The apical ectodermal ridge is a timer for generating distal limb progenitors. *Development* **135**, 1395-1405.
- Mariani, F. V., Ahn, C. P. and Martin, G. R. (2008). Genetic evidence that FGFs have an instructive role in limb proximal-distal patterning. *Nature* **453**, 401-405.
- Marigo, V., Scott, M. P., Johnson, R. L., Goodrich, L. V. and Tabin, C. J. (1996). Conservation in hedgehog signaling: induction of a chicken patched homolog by Sonic hedgehog in the developing limb. *Development* **122**, 1225-1233.
- Martin, G. R. (1998). The roles of FGFs in the early development of vertebrate limbs. *Genes Dev.* **12**, 1571-1586.
- McLeod, M. J. (1980). Differential staining of cartilage and bone in whole mouse fetuses by alcian blue and alizarin red S. *Teratology* **22**, 299-301.
- Michos, O., Panman, L., Vintersten, K., Beier, K., Zeller, R. and Zuniga, A. (2004). Gremlin-mediated BMP antagonism induces the epithelial-mesenchymal feedback signaling controlling metanephric kidney and limb organogenesis. *Development* **131**, 3401-3410.
- Milan, M. and Cohen, S. M. (2000). Temporal regulation of apterous activity during development of the *Drosophila* wing. *Development* **127**, 3069-3078.
- Min, H., Danilenko, D. M., Scully, S. A., Bolon, B., Ring, B. D., Tarpley, J. E., DeRose, M. and Simonet, W. S. (1998). Fgf-10 is required for both limb and lung development and exhibits striking functional similarity to *Drosophila* branchless. *Genes Dev.* **12**, 3156-3161.
- Minowada, G., Jarvis, L. A., Chi, C. L., Neubuser, A., Sun, X., Hacohen, N., Krasnow, M. A. and Martin, G. R. (1999). Vertebrate Sprouty genes are induced by FGF signaling and can cause chondrodysplasia when overexpressed. *Development* **126**, 4465-4475.
- Mukhopadhyay, M., Teufel, A., Yamashita, T., Agulnick, A. D., Chen, L., Downs, K. M., Schindler, A., Grinberg, A., Huang, S. P., Dorward, D. et al. (2003). Functional ablation of the mouse Ldb1 gene results in severe patterning defects during gastrulation. *Development* **130**, 495-505.
- Naiche, L. A. and Papaioannou, V. E. (2003). Loss of Tbx4 blocks hindlimb development and affects vascularization and fusion of the allantois. *Development* **130**, 2681-2693.
- Naiche, L. A. and Papaioannou, V. E. (2007). Tbx4 is not required for hindlimb identity or post-bud hindlimb outgrowth. *Development* **134**, 93-103.
- Ng, M., Diaz-Benjumea, F. J., Vincent, J. P., Wu, J. and Cohen, S. M. (1996). Specification of the wing by localized expression of wingless protein. *Nature* **381**, 316-318.
- Niswander, L., Jeffrey, S., Martin, G. R. and Tickle, C. (1994). A positive feedback loop coordinates growth and patterning in the vertebrate limb. *Nature* **371**, 609-612.
- Ohuchi, H., Nakagawa, T., Yamamoto, A., Araga, A., Ohata, T., Ishimaru, Y., Yoshioka, H., Kuwana, T., Nohno, T., Yamasaki, M. et al. (1997). The mesenchymal factor, FGF10, initiates and maintains the outgrowth of the chick limb bud through interaction with FGF8, an apical ectodermal factor. *Development* **124**, 2235-2244.
- Parr, B. A. and McMahon, A. P. (1995). Dorsalizing signal Wnt-7a required for normal polarity of D-V and A-P axes of mouse limb. *Nature* **374**, 350-353.
- Perantoni, A. O., Timofeeva, O., Naillat, F., Richman, C., Pajni-Underwood, S., Wilson, C., Vainio, S., Dove, L. F. and Lewandoski, M. (2005). Inactivation of FGF8 in early mesoderm reveals an essential role in kidney development. *Development* **132**, 3859-3871.
- Porter, F. D., Drago, J., Xu, Y., Cheema, S. S., Wassif, C., Huang, S. P., Lee, E., Grinberg, A., Massalas, J. S., Bodine, D. et al. (1997). Lhx2, a LIM homeobox gene, is required for eye, forebrain, and definitive erythrocyte development. *Development* **124**, 2935-2944.
- Rallis, C., Bruneau, B. G., Del Buono, J., Seidman, C. E., Seidman, J. G., Nissim, S., Tabin, C. J. and Logan, M. P. (2003). Tbx5 is required for forelimb bud formation and continued outgrowth. *Development* **130**, 2741-2751.
- Reis, T. and Edgar, B. A. (2004). Negative regulation of dE2F1 by cyclin-dependent kinases controls cell cycle timing. *Cell* **117**, 253-264.
- Rhee, H., Polak, L. and Fuchs, E. (2006). Lhx2 maintains stem cell character in hair follicles. *Science* **312**, 1946-1949.
- Riddle, R. D., Johnson, R. L., Laufer, E. and Tabin, C. (1993). Sonic hedgehog mediates the polarizing activity of the ZPA. *Cell* **75**, 1401-1416.
- Riddle, R. D., Ensini, M., Nelson, C., Tsuchida, T., Jessell, T. M. and Tabin, C. (1995). Induction of the LIM homeobox gene Lmx1 by WNT7a establishes dorsoventral pattern in the vertebrate limb. *Cell* **83**, 631-640.
- Rincon-Limas, D. E., Lu, C. H., Canal, I., Calleja, M., Rodriguez-Esteban, C., Izpisua-Belmonte, J. C. and Botas, J. (1999). Conservation of the expression and function of apterous orthologs in *Drosophila* and mammals. *Proc. Natl. Acad. Sci. USA* **96**, 2165-2170.
- Rodriguez-Esteban, C., Schwabe, J. W., Pena, J. D., Rincon-Limas, D. E., Magallon, J., Botas, J. and Belmonte, J. C. (1998). Lhx2, a vertebrate homologue of apterous, regulates vertebrate limb outgrowth. *Development* **125**, 3925-3934.
- Sato, K., Koizumi, Y., Takahashi, M., Kuroiwa, A. and Tamura, K. (2007). Specification of cell fate along the proximal-distal axis in the developing chick limb bud. *Development* **134**, 1397-1406.
- Sekine, K., Ohuchi, H., Fujiwara, M., Yamasaki, M., Yoshizawa, T., Sato, T., Yagishita, N., Matsui, D., Koga, Y., Itoh, N. et al. (1999). Fgf10 is essential for limb and lung formation. *Nat. Genet.* **21**, 138-141.
- Sidow, A., Bulotsky, M. S., Kerrebrock, A. W., Bronson, R. T., Daly, M. J., Reeve, M. P., Hawkins, T. L., Birren, B. W., Jaenisch, R. and Lander, E. S.

- (1997). *Serrate2* is disrupted in the mouse limb-development mutant syndactyliism. *Nature* **389**, 722-725.
- Suleiman, H., Heudobler, D., Raschta, A. S., Zhao, Y., Zhao, Q., Hertting, I., Vitzthum, H., Moeller, M. J., Holzman, L. B., Rachel, R. et al.** (2007). The podocyte-specific inactivation of *Lmx1b*, *Ldb1* and *E2a* yields new insight into a transcriptional network in podocytes. *Dev. Biol.* **304**, 701-712.
- Sun, X., Mariani, F. V. and Martin, G. R.** (2002). Functions of FGF signalling from the apical ectodermal ridge in limb development. *Nature* **418**, 501-508.
- Towers, M., Mahood, R., Yin, Y. and Tickle, C.** (2008). Integration of growth and specification in chick wing digit-patterning. *Nature* **452**, 882-886.
- Valsecchi, C., Ghezzi, C., Ballabio, A. and Rugarli, E. I.** (1997). JAGGED2: a putative Notch ligand expressed in the apical ectodermal ridge and in sites of epithelial-mesenchymal interactions. *Mech. Dev.* **69**, 203-207.
- van Meyel, D. J., Thomas, J. B. and Agulnick, A. D.** (2003). Ssd proteins bind to LIM-interacting co-factors and regulate the activity of LIM-homeodomain protein complexes in vivo. *Development* **130**, 1915-1925.
- Verheyden, J. M. and Sun, X.** (2008). An *Fgf/Gremlin* inhibitory feedback loop triggers termination of limb bud outgrowth. *Nature* **454**, 638-641.
- Verheyden, J. M., Lewandoski, M., Deng, C., Harfe, B. D. and Sun, X.** (2005). Conditional inactivation of *Fgfr1* in mouse defines its role in limb bud establishment, outgrowth and digit patterning. *Development* **132**, 4235-4245.
- Vogel, A., Rodriguez, C., Warnken, W. and Izpisua Belmonte, J. C.** (1995). Dorsal cell fate specified by chick *Lmx1* during vertebrate limb development. *Nature* **378**, 716-720.
- Vyas, P., McDevitt, M. A., Cantor, A. B., Katz, S. G., Fujiwara, Y. and Orkin, S. H.** (1999). Different sequence requirements for expression in erythroid and megakaryocytic cells within a regulatory element upstream of the GATA-1 gene. *Development* **126**, 2799-2811.
- Yang, Y. and Niswander, L.** (1995). Interaction between the signaling molecules *WNT7a* and *SHH* during vertebrate limb development: dorsal signals regulate anteroposterior patterning. *Cell* **80**, 939-947.
- Yang, Y., Topol, L., Lee, H. and Wu, J.** (2003). *Wnt5a* and *Wnt5b* exhibit distinct activities in coordinating chondrocyte proliferation and differentiation. *Development* **130**, 1003-1015.
- Yu, K. and Ornitz, D. M.** (2008). FGF signaling regulates mesenchymal differentiation and skeletal patterning along the limb bud proximodistal axis. *Development* **135**, 483-491.
- Zhao, Y., Kwan, K. M., Mailloux, C. M., Lee, W. K., Grinberg, A., Wurst, W., Behringer, R. R. and Westphal, H.** (2007). LIM-homeodomain proteins *Lhx1* and *Lhx5*, and their cofactor *Ldb1*, control Purkinje cell differentiation in the developing cerebellum. *Proc. Natl. Acad. Sci. USA* **104**, 13182-13186.
- Zhu, J., Nakamura, E., Nguyen, M. T., Bao, X., Akiyama, H. and Mackem, S.** (2008). Uncoupling Sonic hedgehog control of pattern and expansion of the developing limb bud. *Dev. Cell* **14**, 624-632.
- Zimmer, B.** (1989). Peldri II: a quick and easy alternative to critical point drying for scanning electron microscopy. *Am. Fern J.* **79**, 146-150.
- Zuniga, A., Haramis, A. P., McMahon, A. P. and Zeller, R.** (1999). Signal relay by BMP antagonism controls the *SHH/FGF4* feedback loop in vertebrate limb buds. *Nature* **401**, 598-602.
- Zuniga, A., Quillet, R., Perrin-Schmitt, F. and Zeller, R.** (2002). Mouse *Twist* is required for fibroblast growth factor-mediated epithelial-mesenchymal signalling and cell survival during limb morphogenesis. *Mech. Dev.* **114**, 51-59.
